# Supplementary material
Source: MDPI journal article supplement (https://www.mdpi.com/1424-8247/16/2/232)
Supplement: s1 [file s1]

**Supplemental Table 1. EMBASE search strategy.**

- The Embase database: Contains biomedical literature from 1974 to present.
- The MEDLINE & PubMed database: Covers journals from 1966 to present.
- Embase Classic: The Embase back file covering almost 2 million biomedical and pharmacological citations drawn from over 3,000 international titles from between 1947 and 1973

**Supplemental Table 2. PubMed search strategy.**

| Search | Query                                                                                                                                                                                                                                                                                                                                                                                                                   | Results   |
|--------|-------------------------------------------------------------------------------------------------------------------------------------------------------------------------------------------------------------------------------------------------------------------------------------------------------------------------------------------------------------------------------------------------------------------------|-----------|
| #1     | 'percutaneous coronary intervention':ab,ti OR 'percutaneous coronary revascularization':ab,ti OR pci:ab,ti OR (('percutaneous coronary' NEAR/3 intervention):ab,ti) OR (('percutaneous coronary' NEAR/3 revascularization):ab,ti) OR 'drug eluting stents':ab,ti OR 'drug-eluting stents':ab,ti OR des:ab,ti                                                                                                            | 153,917   |
| #2     | 'coronary artery disease':ab,ti OR 'myocardial infarc*':ab,ti OR 'acute coronary syndrome':ab,ti OR acs:ab,ti OR cad:ab,ti OR 'cardiovascular event':ab,ti                                                                                                                                                                                                                                                              | 511,883   |
| #3     | #1 AND #2                                                                                                                                                                                                                                                                                                                                                                                                               | 62,353    |
| #4     | 'dual antiplatelet therapy':ab,ti OR 'dual anti-platelet therapies':ab,ti OR 'dapt'/exp OR dapt                                                                                                                                                                                                                                                                                                                         | 13,138    |
| #5     | 'monotherapy with p2y12 inhibitor':ab,ti OR 'p2y12 inhibitor monotherapy':ab,ti OR 'short term p2y12 inhibitor':ab,ti OR 'short-term p2y12 inhibitor':ab,ti OR clopidogrel:ab,ti OR prasugrel:ab,ti OR ticagrelor:ab,ti OR 'clopidogrel monotherapy':ab,ti OR 'ticagrelor monotherapy':ab,ti                                                                                                                            | 29,152    |
| #6     | #4 AND #5                                                                                                                                                                                                                                                                                                                                                                                                               | 4,983     |
| #7     | #3 AND #6                                                                                                                                                                                                                                                                                                                                                                                                               | 1,809     |
| #8     | 'clinical trial'/de OR 'randomized controlled trial'/de OR 'randomization'/de OR 'single blind procedure'/de OR 'double blind procedure'/de OR 'crossover procedure'/de OR ('randomized controlled' NEXT/1 trial*) OR rct OR 'randomly allocated' OR 'allocated randomly' OR 'random allocation' OR (allocated NEAR/2 random) OR (single NEXT/1 blind*) OR (double NEXT/1 blind*) OR ((treble OR triple) NEAR/1 blind*) | 1,922,855 |
| #9     | 'meta analysis':ab,ti OR 'systematic review':ab,ti OR sr:ab,ti                                                                                                                                                                                                                                                                                                                                                          | 487,729   |
| #10    | 'net work':ab,ti OR network:ab,ti                                                                                                                                                                                                                                                                                                                                                                                       | 575,436   |
| #11    | #9 OR #10                                                                                                                                                                                                                                                                                                                                                                                                               | 1,046,092 |
| #12    | #7 AND #8 NOT #11                                                                                                                                                                                                                                                                                                                                                                                                       | 462       |

| #  | Searches                                                                                                                                                                                                                                                                                                                                                                                                                          | Results   |
|----|-----------------------------------------------------------------------------------------------------------------------------------------------------------------------------------------------------------------------------------------------------------------------------------------------------------------------------------------------------------------------------------------------------------------------------------|-----------|
| #1 | "percutaneous coronary intervention"[Mesh] OR "coronary intervention*, percutaneous":[tiab] OR "intervention*, percutaneous coronary":[tiab] OR "pci":[tiab] OR "percutaneous coronary revascularization":[tiab] OR "coronary revascularization*, percutaneous":[tiab] OR "percutaneous coronary revascularizations":[tiab] OR "revascularization*, percutaneous coronary":[tiab] OR "drug eluting stent*":[tiab] OR "des":[tiab] | 100,646   |
| #2 | "Dual Anti-Platelet Therapy"[Mesh] OR "dual antiplatelet therapy":[tiab] OR "dapt":[tiab] OR "aspirin":[tiab] OR "clopidogrel":[tiab] OR "prasugrel":[tiab] OR "ticagrelor":[tiab] OR "p2y12 inhibitor":[tiab] OR "anti-platelet therapies, dual":[tiab] OR "anti-platelet therapy, dual":[tiab] OR "dual anti-platelet therapy":[tiab] OR "dual anti-platelet therapies":[tiab]                                                  | 66,072    |
| #3 | "Randomized Controlled Trial"[Publication Type] OR "controlled clinical trial":[tiab] OR "clinical trials, randomized":[tiab] OR "trials, randomized clinical":[tiab] OR "randomized clinical studies":[tiab]                                                                                                                                                                                                                     | 581,413   |
| #4 | "Systematic Review"[Publication Type] OR "Meta-Analysis"[Publication Type] OR "Review"[Publication Type] OR "meta-analysis":[ti] OR "systematic review":[ti] OR "literature review":[ti] OR "expert consensus":[ti] OR "case report":[ti]                                                                                                                                                                                         | 3,448,440 |
| #5 | #1 AND #2 AND #3 NOT #4                                                                                                                                                                                                                                                                                                                                                                                                           | 1,157     |

**Supplemental Table 3. Cochrane Library search strategy.**

| #  | Searches                                                                                                                                                                                                                                                                                                                                                                                                                                                 | Results |
|----|----------------------------------------------------------------------------------------------------------------------------------------------------------------------------------------------------------------------------------------------------------------------------------------------------------------------------------------------------------------------------------------------------------------------------------------------------------|---------|
| #1 | MeSH descriptor percutaneous coronary intervention explode all trees OR (coronary intervention*, percutaneous):ti,ab,kw OR (intervention*, percutaneous coronary):ti,ab,kw OR (pci):ti,ab,kw OR (percutaneous coronary revascularization*):ti,ab,kw OR (coronary revascularization*, percutaneous):ti,ab,kw OR (revascularization*, percutaneous coronary):ti,ab,kw OR (drug eluting stent*):ti,ab,kw OR (drug-eluting stent):ti,ab,kw OR (des):ti,ab,kw | 16,722  |
| #2 | (dual antiplatelet therapy):ti,ab,kw OR (dapt):ti,ab,kw OR (aspirin):ti,ab,kw OR (clopidogrel):ti,ab,kw OR (prasugrel):ti,ab,kw OR (ticagrelor):ti,ab,kw OR (p2y12 inhibitor):ti,ab,kw OR (anti-platelet therapies, dual):ti,ab,kw OR (anti-platelet therapy, dual):ti,ab,kw OR (dual anti-platelet therapy):ti,ab,kw OR (dual anti-platelet therapies):ti,ab,kw                                                                                         | 19,281  |
| #3 | 'MeSH descriptor randomized controlled trial explode all trees OR (controlled clinical trial):ti,ab OR (clinical trials, randomized):ti,ab OR (trials, randomized clinical):ti,ab OR (randomized clinical studies):ti,ab                                                                                                                                                                                                                                 | 224,589 |
| #4 | #1 AND #2 AND #3                                                                                                                                                                                                                                                                                                                                                                                                                                         | 670     |

|                   | Random sequence generation (selection bias) | Allocation concealment (selection bias) | Blinding of participants and personnel (performance bias) | Blinding of outcome assessment (detection bias) | Incomplete outcome data (attrition bias) | Selective reporting (reporting bias) | Other bias |
|-------------------|---------------------------------------------|-----------------------------------------|-----------------------------------------------------------|-------------------------------------------------|------------------------------------------|--------------------------------------|------------|
| GLOBAL LEADER ACS | +                                           | +                                       | -                                                         | +                                               | +                                        | +                                    | ?          |
| SMART CHOICE      | +                                           | +                                       | -                                                         | +                                               | +                                        | +                                    | +          |
| STOPDAPT2-ACS     | +                                           | +                                       | -                                                         | +                                               | +                                        | +                                    | +          |
| TICO              | +                                           | +                                       | -                                                         | +                                               | +                                        | +                                    | +          |
| TWILIGHT-ACS      | +                                           | +                                       | +                                                         | +                                               | +                                        | +                                    | +          |

**Supplemental Table 4. Bias risk assessment of the studies.**

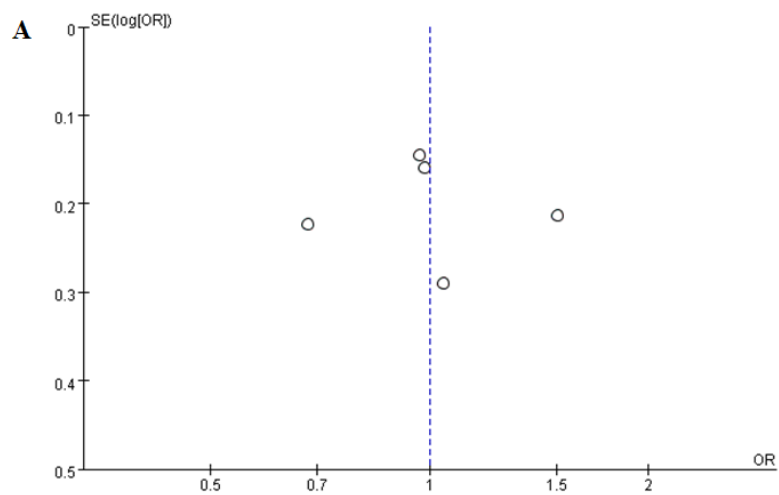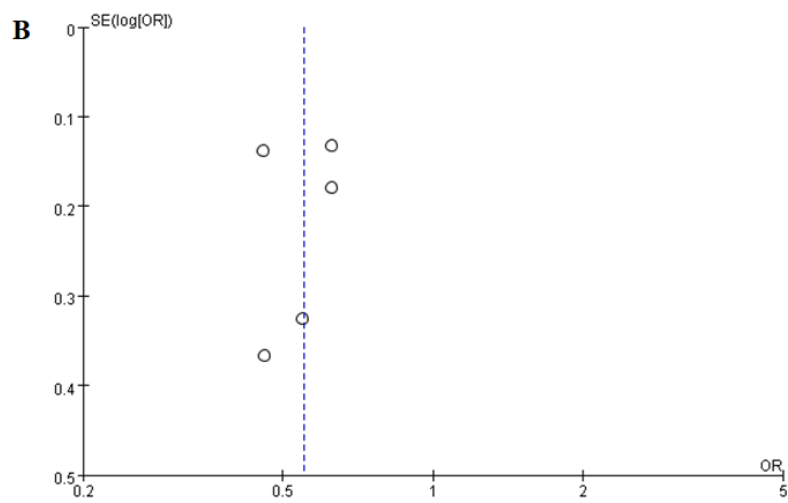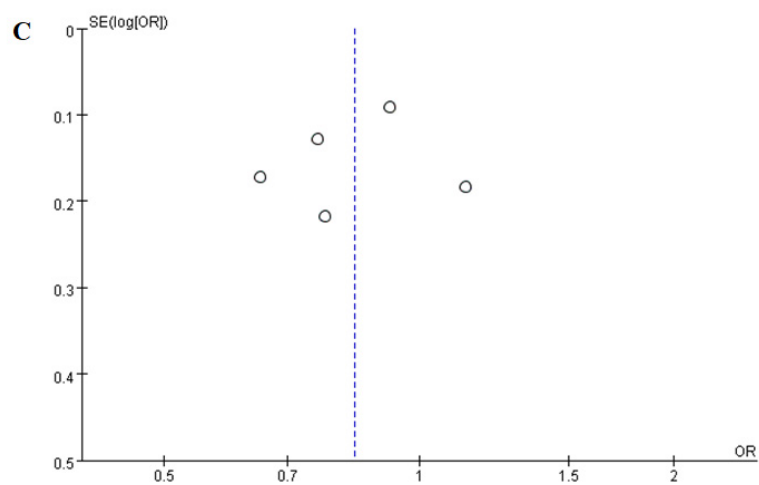

**Supplemental Figure S1.** The funnel plots of each outcome. (A) MACCE, (B) major or minor bleeding, (C) NACE.
